# Supplementary material for: Evaluation of Radiogenomics for Risk Stratification of Intracranial Aneurysms: A Pilot Study
Source: Research Square preprint supplement (doi:10.21203/rs.3.rs-6674755/v1), 2025-05-27
Supplement: Supplementary file 1 [file 7fe2bc5661b6913ef6619897.docx]

**Supplementary Tables**

|  | Asymptomatic (n=13) | Symptomatic (n=3) | p-value | Low-Risk  PHASES (n=12) | High-Risk  PHASES (n=4) | p-value |
| --- | --- | --- | --- | --- | --- | --- |
| Age | 69.08±6.65 | 56.67±11.26 | 0.069 | 65.5±9.78 | 70.5±5.22 | 0.292 |
| Sex | 9 (69%) | 2 (67%) | 0.545 | 8 (67%) | 3 (75%) | 0.755 |
| Smoking | 7 (54%) | 2 (67%) | 0.809 | 6 (50%) | 3 (75%) | 0.771 |
| Hypertension | 11 (85%) | 1 (33%) | 0.267 | 9 (75%) | 3 (75%) | 1.0 |
| History of IA | 2 (15%) | 1 (33%) | 0.918 | 3 (25%) | 0 (0%) | 0.712 |
| Size (mm) | 3.89±1.92 | 2.9±1.11 | 0.089 | 3.09±0.92 | 5.54±2.53 | 0.051 |
| Size Ratio | 1.33±0.75 | 1.12±0.42 | 0.5 | 1.08±0.36 | 1.94±1.03 | 0.151 |
| Aspect Ratio | 1.01±0.45 | 0.81±0.12 | 0.343 | 0.84±0.24 | 1.37±0.56 | **0.039** |
| ICA | 3 (23%) | 0 (0%) | 0.918 | 3 (25%) | 0 (0%) | 0.712 |
| MCA | 3 (23%) | 1 (33%) | 0.712 | 2 (17%) | 2 (50%) | 0.505 |
| AComm/Posterior | 7 (54%) | 2 (67%) | 0.809 | 7 (58%) | 2 (50%) | 0.771 |

**Supplementary Table 1.** Demographics of patients with symptomatic and asymptomatic IAs as well as low-risk and high-risk IAs based on PHASES.

**Supplementary Table 2.** Significantlydifferent radiomics features betweensymptomatic and asymptomatic IAs.

| **Feature** | **Asymptomatic** | **Symptomatic** | **p-value** |
| --- | --- | --- | --- |
| Post GLDM Dependence NonUniformity Normalized | 0.271 ± 0.049 | 0.336 ± 0.014 | 0.043 |
| Post GLDM Large Dependence Emphasis | 6.934 ± 2.507 | 4.569 ± 0.278 | 0.04 |
| Post GLRLM Run Variance | 0.057 ± 0.021 | 0.038 ± 0.003 | 0.04 |
| Post GLSZM Large Area Emphasis | 8.499 ± 5.729 | 3.687 ± 0.39 | 0.03 |
| Post GLSZM Zone Variance | 4.447 ± 4.024 | 1.234 ± 0.201 | 0.04 |
| Diff First Order 90th Percentile | 0.293 ± 0.554 | -0.153 ± 0.073 | 0.022 |
| Diff First Order Energy | 147.059 ± 335.58 | -34.777 ± 19.26 | 0.04 |
| Diff First Order Interquartile Range | 0.14 ± 0.343 | -0.072 ± 0.081 | 0.03 |
| Diff First Order Maximum | 0.685 ± 0.743 | -0.036 ± 0.182 | 0.022 |
| Diff First Order Mean Absolute Deviation | 0.078 ± 0.161 | -0.03 ± 0.041 | 0.03 |
| Diff First Order Robust Mean Absolute Deviation | 0.056 ± 0.14 | -0.027 ± 0.035 | 0.04 |
| Diff First Order Root Mean Squared | 0.188 ± 0.317 | -0.084 ± 0.024 | 0.04 |
| Diff First Order Total Energy | 9.412 ± 21.477 | -2.226 ± 1.233 | 0.04 |
| Diff First Order Variance | 0.113 ± 0.242 | -0.029 ± 0.054 | 0.03 |
| Diff GLCM Joint Entropy | -0.197 ± 0.29 | 0.035 ± 0.132 | 0.04 |
| Diff GLDM Dependence Non-Uniformity Normalized | -0.029 ± 0.027 | 0.015 ± 0.025 | 0.023 |
| Diff GLDM Small Dependence Emphasis | -0.045 ± 0.039 | 0.019 ± 0.015 | 0.016 |
| Diff GLRLM Run Length Non-Uniformity | -10.609 ± 20.52 | 2.652 ± 3.558 | 0.03 |
| Diff GLSZM Large Area Emphasis | 1.948 ± 3.966 | -0.567 ± 0.899 | 0.04 |
| Diff GLSZM Size Zone Non-Uniformity Normalized | -0.036 ± 0.036 | 0.013 ± 0.028 | 0.044 |
| Diff GLSZM Zone Percentage | -0.046 ± 0.045 | 0.019 ± 0.024 | 0.031 |
| Diff NGTDM Complexity | -112.337 ± 143.438 | 114.86 ± 77.887 | 0.021 |

Post: Radiomics based on Post-contrast MRI; Diff: Radiomics based on difference between Pre- and Post-contrast MRI.

**Supplementary Table 3.** Significantlydifferent radiomics features betweenhigh-risk and low-risk IAs based on PHASES.

| **Feature** | **Low-Risk** | **High-Risk** | **p-value** |
| --- | --- | --- | --- |
| Diff GLCM Cluster Prominence | 1711.792 ± 17200.743 | -16364.549 ± 10811.822 | 0.017 |
| Diff GLCM Imc1 | -0.007 ± 0.035 | 0.034 ± 0.022 | 0.049 |
| Diff GLCM Imc2 | -0.006 ± 0.027 | -0.02 ± 0.02 | 0.030 |
| Diff GLCM Sum Entropy | -0.051 ± 0.254 | -0.216 ± 0.142 | 0.030 |
| Diff GLDM Gray Level Non-Uniformity | 3.575 ± 10.499 | 6.193 ± 5.966 | 0.039 |
| Diff GLDM Small Dependence Low Gray Level Emphasis | 0.002 ± 0.003 | -0.003 ± 0.005 | 0.039 |
| Diff GLRLM Gray Level Non-Uniformity | 2.974 ± 8.921 | 5.847 ± 5.165 | 0.023 |
| Diff GLSZM Gray Level Non-Uniformity | -0.209 ± 1.557 | 2.228 ± 1.16 | 0.013 |
| Diff GLSZM Low Gray Level Zone Emphasis | 0.005 ± 0.007 | -0.005 ± 0.009 | 0.029 |
| Diff GLSZM Small Area Low Gray Level Emphasis | 0.004 ± 0.004 | -0.004 ± 0.008 | 0.030 |

Diff: Radiomics based on difference between Pre- and Post-contrast MRI.

**Supplementary Table 4.** Differentially expressed genes betweensymptomatic and symptomatic IAs.

| **Genes** | **p-value** | **log(Fold Change)** | |
| --- | --- | --- | --- |
| KIF5A | <0.001 | -5.92363 |
| WARS | <0.001 | 1.568086 |
| LMCD1 | <0.001 | -6.16184 |
| SYNJ2 | <0.001 | 1.240609 |
| SLC47A1 | <0.001 | -6.38692 |
| ADAMDEC1 | <0.001 | -6.06466 |
| HBG2 | <0.001 | 4.19102 |
| SPIRE2 | <0.001 | -3.83867 |
| KYNU | <0.001 | 1.155148 |
| GSTO2 | <0.001 | 2.12995 |
| C11orf45 | <0.001 | -2.55922 |
| SEC14L5 | <0.001 | 2.018611 |
| CCNE2 | <0.001 | -1.64969 |
| CPA5 | <0.001 | -5.67619 |
| APOL6 | <0.001 | 1.161101 |
| PSTPIP2 | <0.001 | 1.490387 |
| MYO16 | <0.001 | -5.32388 |
| KAZN | <0.001 | 1.268098 |
| VSIG2 | <0.001 | -5.45368 |
| VIT | <0.001 | -5.79864 |
| SLC4A10 | <0.001 | 1.770192 |
| QRFP | <0.001 | -5.86127 |
| PRRG4 | <0.001 | 1.244275 |
| EIF3CL | <0.001 | -2.2556 |
| ARL17A | <0.001 | 2.081956 |
| OTOF | <0.001 | -6.07445 |
| PPIE | <0.001 | -1.04303 |
| PLB1 | <0.001 | -1.1015 |
| STAT1 | <0.001 | 1.184181 |
| TRIM36 | <0.001 | 2.128141 |
| DAB2IP | <0.001 | 2.714134 |
| SH3RF2 | <0.001 | -5.98325 |
| SULT1C4 | <0.001 | 2.212998 |
| MYO18B | <0.001 | -7.64204 |
| SHISA7 | <0.001 | -2.68511 |
| TEAD2 | <0.001 | -3.58365 |
| CCL4L2 | 0.001 | -2.52522 |
| SIX5 | 0.001 | -2.30935 |
| OAZ3 | 0.001 | -3.79369 |
| DNASE1L3 | 0.001 | -1.88075 |
| BSPRY | 0.001 | -2.46169 |
| IFI27 | 0.001 | 1.576404 |
| CCDC15 | 0.002 | -1.0961 |
| LAIR2 | 0.002 | -1.95962 |
| HEY1 | 0.002 | 1.501733 |
| ZNF34 | 0.002 | -1.20201 |
| EDN3 | 0.002 | -5.74424 |
| CCL3L3 | 0.002 | -4.75002 |
| AP000304.12 | 0.002 | -2.7377 |
| PARP9 | 0.002 | 1.063061 |
| PSCA | 0.002 | -2.73344 |
| TRIM9 | 0.002 | 1.941495 |
| LGALSL | 0.002 | 1.046899 |
| SERPINH1 | 0.003 | -1.23608 |
| MARVELD2 | 0.003 | -1.90369 |
| MAP1B | 0.003 | 2.446456 |
| PARP14 | 0.003 | 1.206027 |
| C1orf198 | 0.003 | 1.024282 |
| STXBP1 | 0.003 | -1.81905 |
| GBP1 | 0.003 | 1.279194 |
| GREM2 | 0.003 | -2.92003 |
| ZNF577 | 0.003 | -1.04971 |
| PAM | 0.004 | 1.024591 |
| LRRC69 | 0.004 | -1.27959 |
| C11orf65 | 0.004 | -3.05684 |
| FEN1 | 0.004 | -1.1961 |
| SAXO1 | 0.004 | -2.37587 |
| AC004556.1 | 0.005 | -2.12909 |
| IL31RA | 0.005 | 1.802165 |
| CTTN | 0.005 | 1.00884 |
| PRSS23 | 0.006 | -1.16514 |
| PCDH1 | 0.005 | -1.29092 |
| TECTA | 0.006 | 1.240952 |
| RPP40 | 0.006 | -1.02082 |
| CALD1 | 0.006 | 1.413536 |
| NEBL | 0.006 | 2.948536 |
| CACHD1 | 0.006 | 1.649793 |
| ZNF358 | 0.007 | -1.0071 |
| GNLY | 0.007 | -1.16146 |
| PCDHGA7 | 0.007 | -2.01913 |
| PADI6 | 0.007 | -3.83805 |
| CDCA8 | 0.007 | 1.086571 |
| KIR2DL1 | 0.008 | -1.77439 |
| SPTSSB | 0.008 | 1.221833 |
| GBP4 | 0.008 | 1.003093 |
| SERPING1 | 0.008 | 1.506401 |
| METTL20 | 0.009 | -1.14644 |
| ZAR1L | 0.008 | 1.696523 |
| AJUBA | 0.009 | -1.9999 |
| PLCD3 | 0.008 | -1.59184 |
| ZNF835 | 0.009 | -1.35447 |
| KIAA2022 | 0.009 | -1.48316 |
| MERTK | 0.009 | -1.59246 |
| CLCN4 | 0.009 | 1.149978 |
| ITGB1BP2 | 0.009 | 1.418768 |
| C5orf47 | 0.01 | 1.858113 |
| NUAK1 | 0.01 | -2.72666 |

**Supplementary Table 5.** Differentially expressed genes betweenlow-risk and high-risk IAs based on PHASES.

| **Genes** | | **p-value** | | **log(Fold Change)** | |
| --- | --- | --- | --- | --- | --- |
| BAIAP3 | <0.001 | | 1.284382 | |
| CSDC2 | <0.001 | | -7.21406 | |
| MGP | <0.001 | | 3.694169 | |
| DEFA1 | <0.001 | | 2.748206 | |
| HBA1 | <0.001 | | -3.91129 | |
| C17orf53 | <0.001 | | -3.05289 | |
| CAMP | <0.001 | | 1.26664 | |
| DEFA4 | <0.001 | | 2.098116 | |
| GPR20 | <0.001 | | -2.92841 | |
| AZU1 | <0.001 | | 1.71647 | |
| COL17A1 | 0.002 | | 1.891383 | |
| HBB | 0.005 | | -2.56273 | |
| FADS2 | 0.001 | | 1.189062 | |
| APOA1 | 0.001 | | -2.65323 | |
| SLC2A14 | 0.008 | | 1.255604 | |
| KRT73 | 0.01 | | 1.146827 | |
| RPH3A | 0.009 | | -1.95586 | |
| PLBD2 | 0.004 | | -1.01885 | |
| VSIG10 | 0.003 | | 1.128107 | |
| MYO16 | 0.001 | | 2.42229 | |
| AC233755.1 | 0.009 | | -1.69359 | |
| HBA2 | 0.002 | | -3.49273 | |
| RPL3L | 0.008 | | -2.41712 | |
| C3 | 0.008 | | -1.4115 | |
| COL5A3 | 0.008 | | -2.74362 | |
| CACNA1A | 0.007 | | 1.245472 | |
| RGPD6 | 0.005 | | -1.7811 | |
| NEB | 0.008 | | 1.448682 | |
| FN1 | 0.009 | | 3.251917 | |
| DRICH1 | 0.002 | | -2.12189 | |
| PTPRG | 0.009 | | 1.254912 | |
| GPM6A | 0.005 | | 1.473865 | |
| SH3PXD2B | 0.005 | | -2.69254 | |
| TUBB2B | 0.01 | | -2.61075 | |
| GPER1 | 0.008 | | 1.199526 | |
| DEFA3 | 0.009 | | 1.906631 | |
| FZD6 | 0.006 | | 1.05456 | |
| VSIG4 | 0.008 | | 1.147374 | |

**Supplementary Table 6**: Correlation between differentially expressed genes and radiomics features using symptomatic status.

| **Feature** | **Gene** | **PCC** | **p-value** |
| --- | --- | --- | --- |
| Diff First Order Interquartile Range | MYO18B | 0.846 | <0.001 |
| Diff GLCM Imc1 | CSDC2 | -0.777 | <0.001 |
| Diff First Order 90Percentile | MYO18B | 0.774 | <0.001 |
| Diff First Order Maximum | MYO18B | 0.709 | 0.002 |
| Diff GLCM Cluster Prominence | CSDC2 | 0.707 | 0.002 |
| Diff First Order Maximum | OTOF | 0.685 | 0.003 |
| Diff NGTDM Complexity | KIF5A | -0.684 | 0.003 |
| Diff GLCM Joint Entropy | OTOF | -0.68 | 0.004 |
| Diff GLCM Imc1 | C3 | -0.662 | 0.005 |
| Diff GLDM Dependence Non-Uniformity Normalized | NUAK1 | -0.657 | 0.006 |
| Diff NGTDM Complexity | DAB2IP | 0.649 | 0.007 |
| Diff GLDM Small Dependence Emphasis | NUAK1 | -0.641 | 0.007 |
| Diff GLCM Imc1 | C17orf53 | -0.638 | 0.008 |
| Diff NGTDM Complexity | MERTK | -0.624 | 0.01 |
| Diff GLDM Small Dependence Emphasis | LMCD1 | -0.62 | 0.01 |
| Diff NGTDM Complexity | C11orf65 | -0.615 | 0.011 |
| Post GLDM Dependence Non-Uniformity Normalized | LMCD1 | -0.613 | 0.011 |
| Diff GLDM Small Dependence Low Gray Level Emphasis | FADS2 | -0.613 | 0.012 |
| Diff NGTDM Complexity | NUAK1 | -0.613 | 0.012 |
| Diff GLDM Small Dependence Emphasis | C11orf45 | -0.611 | 0.012 |
| Post GLDM Dependence Non-Uniformity Normalized | LRRC69 | -0.604 | 0.013 |
| Diff GLCM Imc1 | BAIAP3 | 0.603 | 0.013 |
| Post GLDM Dependence Non-Uniformity Normalized | SLC47A1 | -0.601 | 0.014 |
| Diff NGTDM Complexity | SPIRE2 | -0.592 | 0.016 |
| Diff NGTDM Complexity | GNLY | -0.584 | 0.017 |
| Diff GLDM Small Dependence Low Gray Level Emphasis | AC233755.1 | 0.581 | 0.018 |
| Diff First Order Maximum | LMCD1 | 0.58 | 0.019 |
| Diff NGTDM Complexity | HEY1 | 0.579 | 0.019 |
| Diff GLCM Cluster Prominence | C17orf53 | 0.576 | 0.019 |
| Diff GLSZM Size Zone Non-Uniformity Normalized | METTL20 | -0.574 | 0.02 |
| Diff GLSZM Size Zone Non-Uniformity Normalized | PCDH1 | -0.572 | 0.021 |
| Diff NGTDM Complexity | PCDHGA7 | -0.571 | 0.021 |
| Diff GLSZM Size Zone Non-Uniformity Normalized | C11orf45 | -0.568 | 0.022 |
| Diff GLRLM Run Length Non-Uniformity | LMCD1 | -0.566 | 0.022 |
| Diff GLDM Small Dependence Low Gray Level Emphasis | C17orf53 | 0.565 | 0.023 |
| Diff GLSZM Size Zone Non-Uniformity Normalized | LRRC69 | -0.562 | 0.023 |
| Diff GLDM Dependence Non-Uniformity Normalized | OTOF | -0.562 | 0.024 |
| Diff GLSZM Size Zone Non-Uniformity Normalized | LMCD1 | -0.557 | 0.025 |
| Diff GLDM Small Dependence Low Gray Level Emphasis | SH3PXD2B | 0.557 | 0.025 |
| Diff GLCM Joint Entropy | IL31RA | 0.556 | 0.025 |
| Diff GLDM Small Dependence Emphasis | OTOF | -0.554 | 0.026 |
| Diff GLDM Dependence Non-Uniformity Normalized | LAIR2 | -0.553 | 0.026 |
| Diff NGTDM Complexity | SIX5 | -0.553 | 0.026 |
| Diff GLDM Small Dependence Emphasis | VIT | -0.553 | 0.026 |
| Diff GLDM Small Dependence Emphasis | PCDH1 | -0.55 | 0.027 |
| Diff GLSZM Size Zone Non-Uniformity Normalized | OAZ3 | -0.55 | 0.027 |
| Diff GLDM Dependence Non-Uniformity Normalized | GNLY | -0.549 | 0.028 |
| Diff GLDM Small Dependence Low Gray Level Emphasis | SLC2A14 | -0.549 | 0.028 |
| Diff First Order 90Percentile | ZNF358 | 0.548 | 0.028 |
| Diff NGTDM Complexity | C11orf45 | -0.547 | 0.028 |
| Diff GLCM Imc2 | C3 | 0.546 | 0.029 |
| Diff GLDM Small Dependence Emphasis | CCL4L2 | -0.543 | 0.03 |
| Diff First Order Maximum | KIAA2022 | 0.542 | 0.03 |
| Diff First Order Interquartile Range | PSTPIP2 | -0.54 | 0.031 |
| Diff First Order 90Percentile | CLCN4 | -0.54 | 0.031 |
| Diff GLDM Small Dependence Emphasis | METTL20 | -0.535 | 0.033 |
| Diff GLDM Small Dependence Low Gray Level Emphasis | C3 | 0.535 | 0.033 |
| Diff GLDM Small Dependence Emphasis | MYO18B | -0.534 | 0.033 |
| Diff NGTDM Complexity | GSTO2 | 0.534 | 0.033 |
| Diff NGTDM Complexity | ZNF577 | -0.533 | 0.034 |
| Diff GLDM Dependence Non-Uniformity Normalized | KIF5A | -0.532 | 0.034 |
| Diff GLDM Dependence Non-Uniformity Normalized | C11orf45 | -0.532 | 0.034 |
| Diff GLDM Gray Level Non-Uniformity | KRT73 | 0.532 | 0.034 |
| Diff GLDM Small Dependence Emphasis | ZNF577 | -0.532 | 0.034 |
| Diff GLSZM Size Zone Non-Uniformity Normalized | VIT | -0.53 | 0.035 |
| Diff First Order 90Percentile | OTOF | 0.53 | 0.035 |
| Diff GLSZM Size Zone Non-Uniformity Normalized | PADI6 | -0.53 | 0.035 |
| Diff First Order Interquartile Range | SERPING1 | -0.526 | 0.036 |
| Diff GLCM Joint Entropy | LMCD1 | -0.522 | 0.038 |
| Diff GLDM Small Dependence Emphasis | PSCA | -0.517 | 0.04 |
| Diff GLDM Dependence Non-Uniformity Normalized | CCL4L2 | -0.514 | 0.042 |
| Post GLDM Dependence Non-Uniformity Normalized | ADAMDEC1 | -0.514 | 0.042 |
| Diff GLSZM Size Zone Non-Uniformity Normalized | ZNF577 | -0.513 | 0.042 |
| Post GLDM Dependence Non-Uniformity Normalized | C11orf65 | -0.512 | 0.043 |
| Diff First Order Interquartile Range | MAP1B | -0.511 | 0.043 |
| Diff GLSZM Size Zone Non-Uniformity Normalized | KYNU | 0.511 | 0.043 |
| Diff GLDM Small Dependence Emphasis | SH3RF2 | -0.509 | 0.044 |
| Diff NGTDM Complexity | OTOF | -0.508 | 0.044 |
| Diff GLDM Small Dependence Emphasis | SPIRE2 | -0.508 | 0.045 |
| Post GLDM Dependence Non-Uniformity Normalized | PLB1 | -0.508 | 0.045 |
| Diff NGTDM Complexity | OAZ3 | -0.507 | 0.045 |
| Diff NGTDM Complexity | GREM2 | -0.507 | 0.045 |
| Diff GLDM Small Dependence Emphasis | PRSS23 | -0.507 | 0.045 |
| Diff GLDM Small Dependence Emphasis | SLC47A1 | -0.506 | 0.045 |
| Diff NGTDM Complexity | MYO18B | -0.503 | 0.047 |
| Diff GLDM Small Dependence Emphasis | PCDHGA7 | -0.501 | 0.048 |
| Diff GLCM Joint Entropy | PCDHGA7 | -0.5 | 0.049 |
| Diff GLDM Dependence Non-Uniformity Normalized | MYO18B | -0.5 | 0.049 |
| Diff GLDM Small Dependence Emphasis | EIF3CL | -0.499 | 0.049 |
| Diff GLRLM Run Length Non-Uniformity | OTOF | -0.498 | 0.049 |
| Diff GLDM Dependence Non-Uniformity Normalized | PRSS23 | -0.498 | 0.05 |

Post: Radiomics based on Post-contrast MRI; Diff: Radiomics based on difference between Pre- and Post-contrast MRI.

**Supplementary Table 7**: Correlation between differentially expressed genes and radiomics features using PHASES score.

| **Feature** | **Gene** | **PCC** | **p-value** |
| --- | --- | --- | --- |
| Diff GLCM Imc1 | MYO18B | -0.591 | 0.016 |
| Diff GLCM Imc2 | OTOF | -0.545 | 0.029 |
| Diff GLCM Cluster Prominence | MYO18B | 0.543 | 0.029 |
| Diff GLDM Small Dependence Low Gray Level Emphasis | GREM2 | -0.534 | 0.033 |
| Diff GLDM Gray Level Non-Uniformity | OTOF | 0.521 | 0.039 |
| Diff GLDM Small Dependence Low Gray Level Emphasis | HEY1 | 0.516 | 0.041 |
| Diff GLDM Gray Level Non-Uniformity | IL31RA | -0.513 | 0.042 |
| Diff GLDM Small Dependence Low Gray Level Emphasis | PCDHGA7 | -0.499 | 0.049 |

Diff: Radiomics based on difference between Pre- and Post-contrast MRI.
